# Supplementary material for: Influence of Laparoscopic Surgery on Cellular Immunity in Colorectal Cancer: A Systematic Review and Meta-Analysis
Source: MDPI journal article supplement (doi:10.3390/cancers15133381), 2023-06-28
Supplement: s1 [file s1]

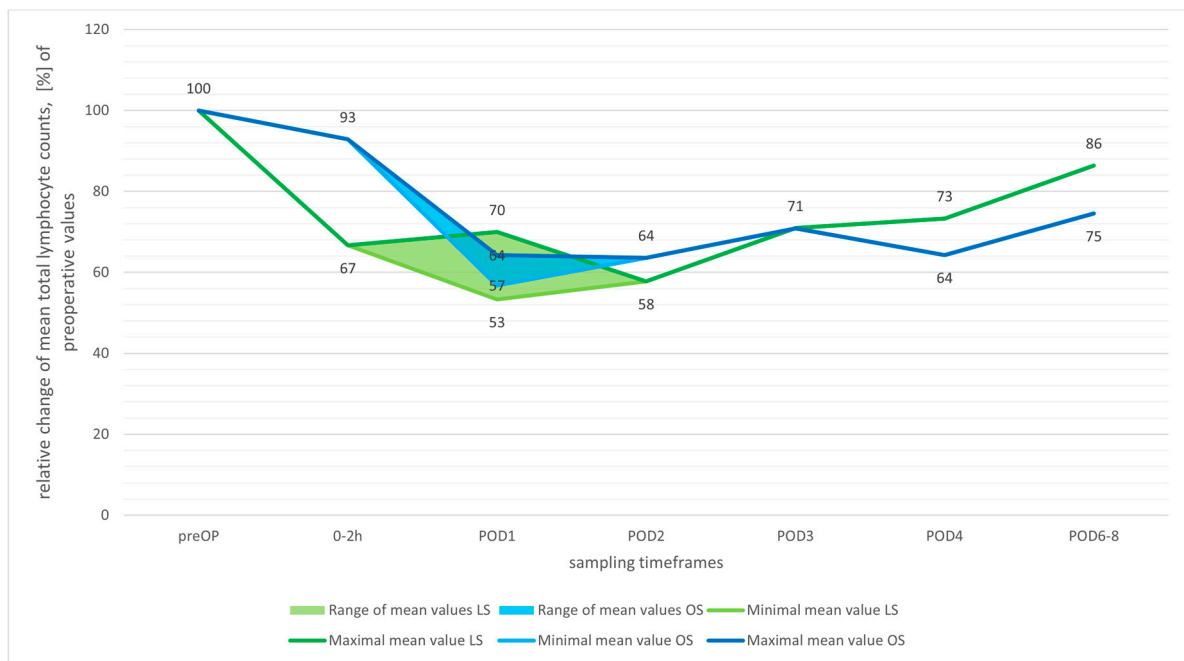

**Figure S1.** Postoperative development of total lymphocyte count relative to preoperative measurements, relative change in means with preoperative values set at 100%.

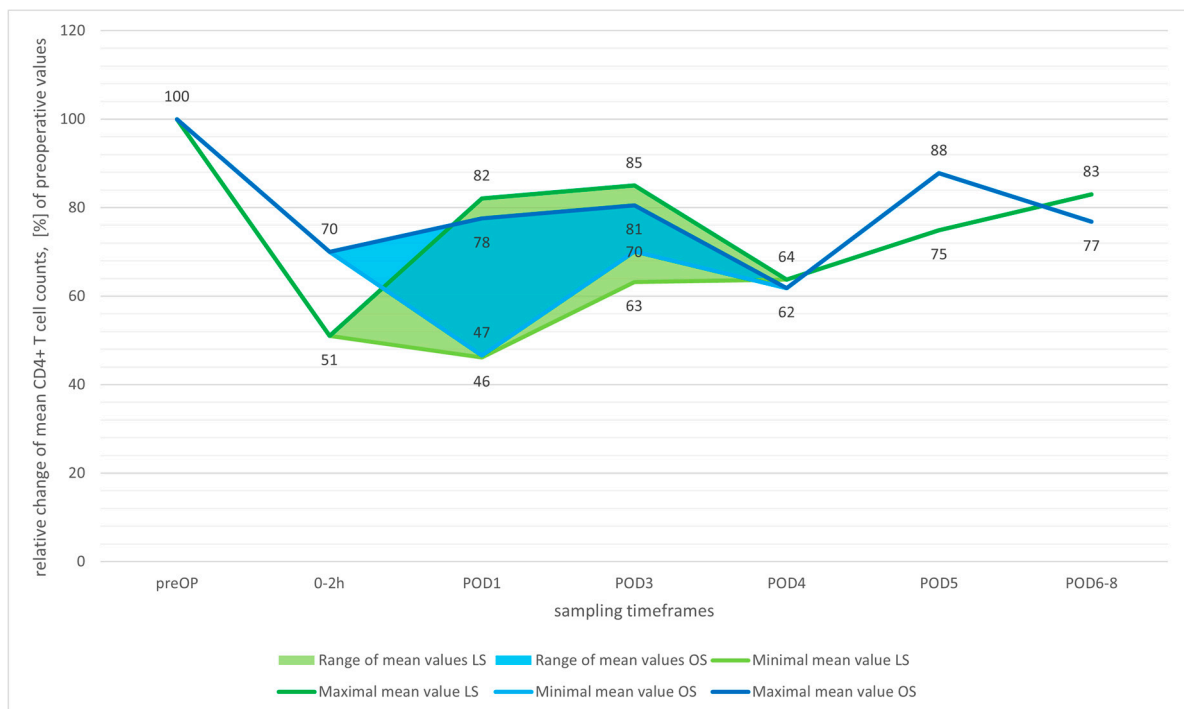

**Figure S2.** Postoperative development of CD4+ T cell count relative to preoperative measurements, relative change in means with preoperative values set at 100%.

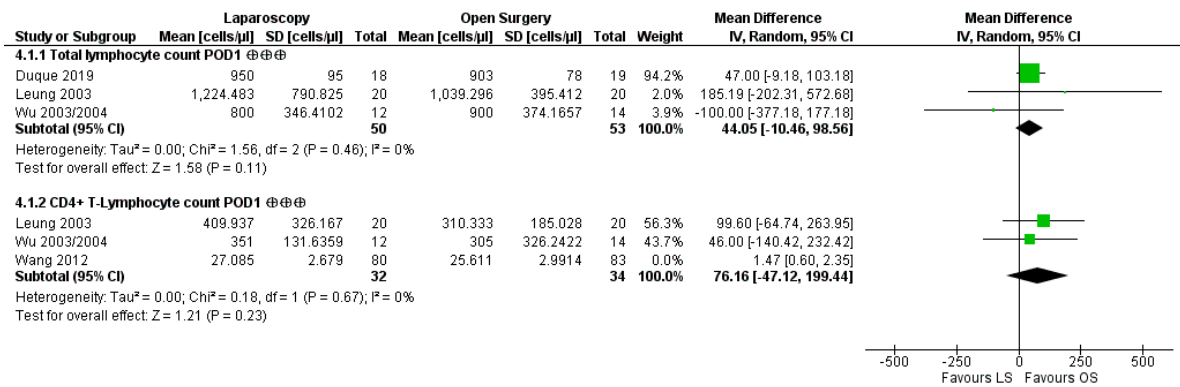

**Figure S3.** Forest plot of total lymphocyte and CD4+ T lymphocyte counts at postoperative day (POD)1; ⊕⊕⊕ indicates moderate confidence in estimates of effect [50,55,60–62].

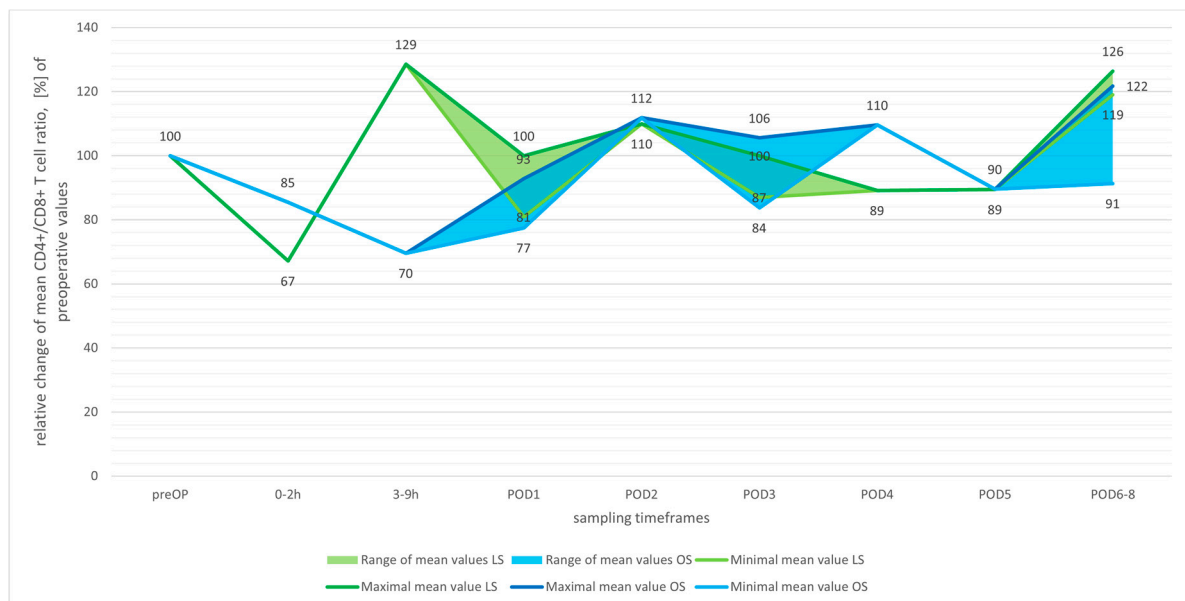

**Figure S4.** Postoperative development of CD4+/CD8+ ratio relative to preoperative measurements, relative change in means with preoperative values set at 100%.

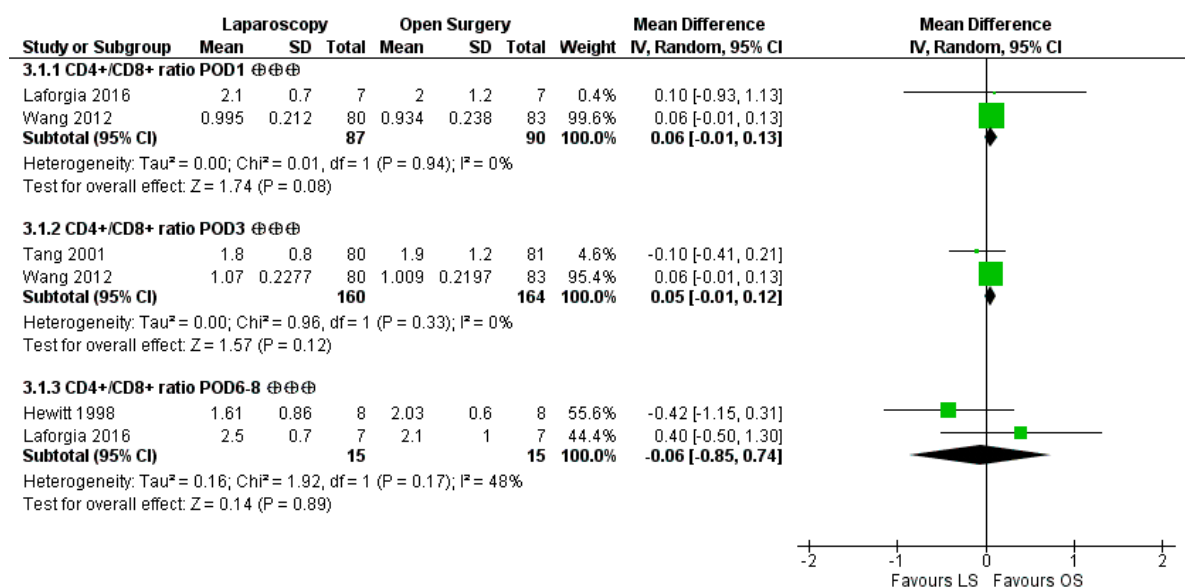

**Figure S5.** Forest plot of CD4+/CD8+ ratio at postoperative day (POD)1, POD3, POD6–8; ⊕⊕⊕ indicates moderate confidence in estimates of effect [48,49,52,60].
